# Supplementary material for: DABCO-based ionic liquids: introduction of two metal-free catalysts for one-pot synthesis of 1,2,4-triazolo[4,3-a]pyrimidines and pyrido[2,3-d]pyrimidines
Source: Royal Society of Chemistry journal article supplement (doi:10.1039/c8nj01455h), 2018-01-01
Supplement: c8nj01455h1.pdf [file c8nj01455h1.pdf]

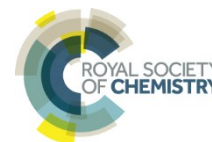

NJC

ARTICLE

Supporting information

**DABCO-based ionic liquids: Introduction of two metal-free catalysts for one-pot synthesis of 1,2,4-triazolo[4,3-*a*]pyrimidines and pyrido[2,3-*d*]pyrimidines**

N. Jamasbi, M. Irankhah-Khanghah, F. Shirini,\* H. Tajik, M. S. N. Langarudi.

*Department of Chemistry, College of Science, University of Guilan, Rasht, 41335-19141, Iran, Tel/Fax: +981313233262; e-mail: shirini@guilan.ac.ir (and also fshirini@gmail.com).*

Table of Contents

|     |                                                                                                                                                                      |       |
|-----|----------------------------------------------------------------------------------------------------------------------------------------------------------------------|-------|
| I   | A copy of FT-IR, Mass, and NMR spectra of [H <sub>2</sub> -DABCO][H <sub>2</sub> PO <sub>4</sub> ] <sub>2</sub>                                                      | 2, 3  |
| II  | A copy of FT-IR, Mass, and NMR spectra of [H <sub>2</sub> -DABCO][ClO <sub>4</sub> ] <sub>2</sub>                                                                    | 4, 5  |
| III | A copy of FT-IR and NMR spectra of 5-amino-7-(naphthalen-2-yl)-7,8-dihydro-[1,2,4]triazolo[4,3- <i>a</i> ]pyrimidine-6-carbonitrile (4i)                             | 6-8   |
| IV  | A copy of FT-IR and NMR spectra of 5-amino-7-(3-methoxyphenyl)-7,8-dihydro-[1,2,4]triazolo[4,3- <i>a</i> ]pyrimidine-6-carbonitrile(4j)                              | 9-11  |
| V   | A copy of FT-IR and NMR spectra of 5,5'-(1,3-phenylene)bis(7-amino-1,3-dimethyl-2,4-dioxo-1,2,3,4-tetrahydropyrido[2,3- <i>d</i> ]pyrimidine-6-carbonitrile) (6o)    | 12-14 |
| VI  | A copy of FT-IR and NMR spectra of 7-amino-5-(4-(dimethylamino)phenyl)-1,3-dimethyl-2,4-dioxo-1,2,3,4-tetrahydropyrido[2,3- <i>d</i> ]pyrimidine-6-carbonitrile (6p) | 15-17 |
|     | References                                                                                                                                                           | 18    |

I. A copy of FT-IR, Mass, and NMR spectra of  $[\text{H}_2\text{-DABCO}][\text{H}_2\text{PO}_4]_2^1$ 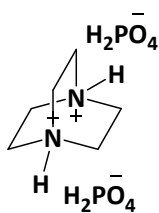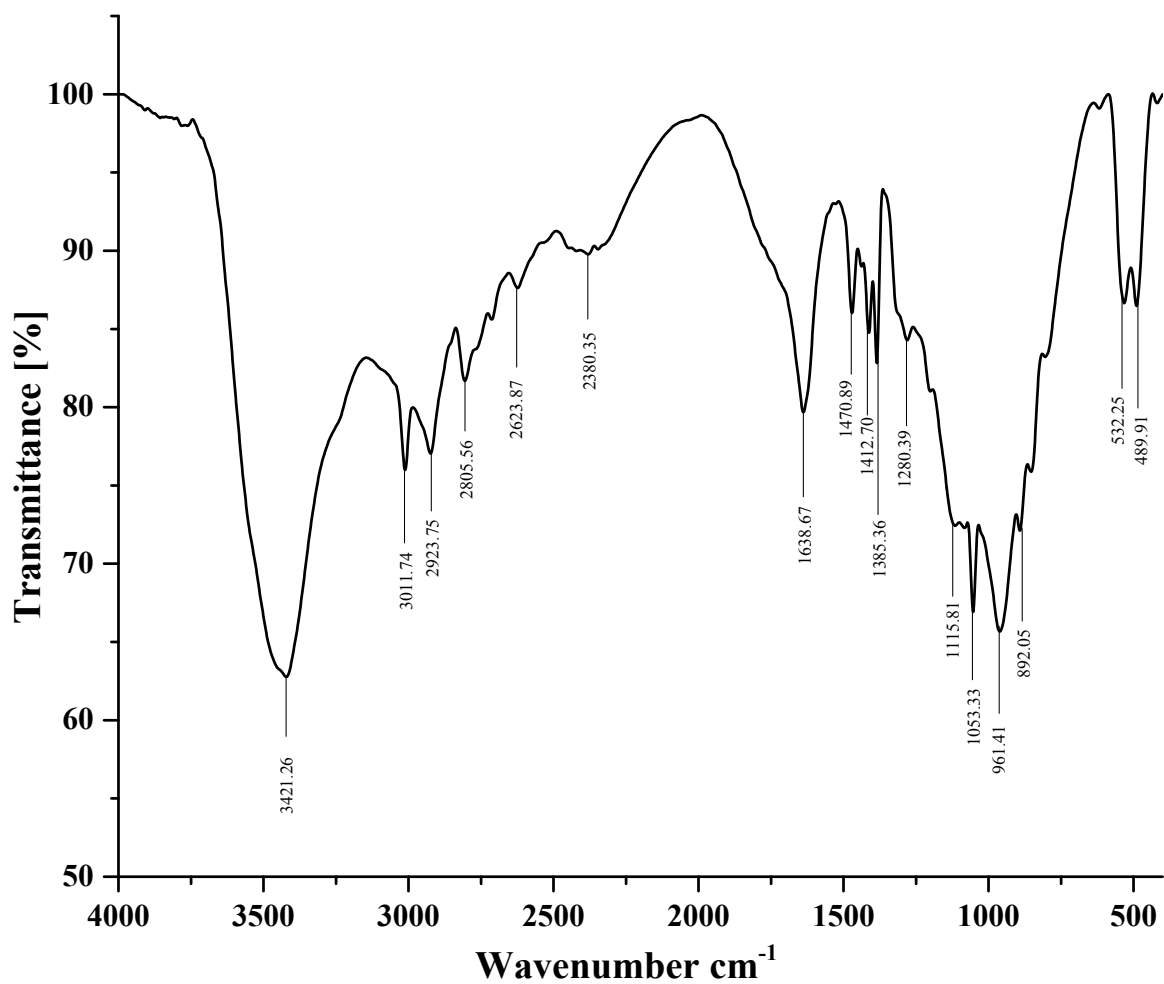

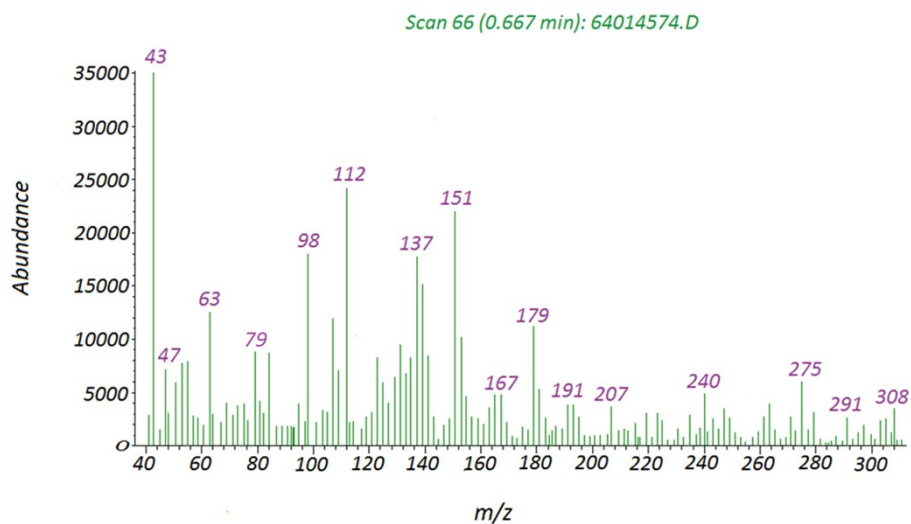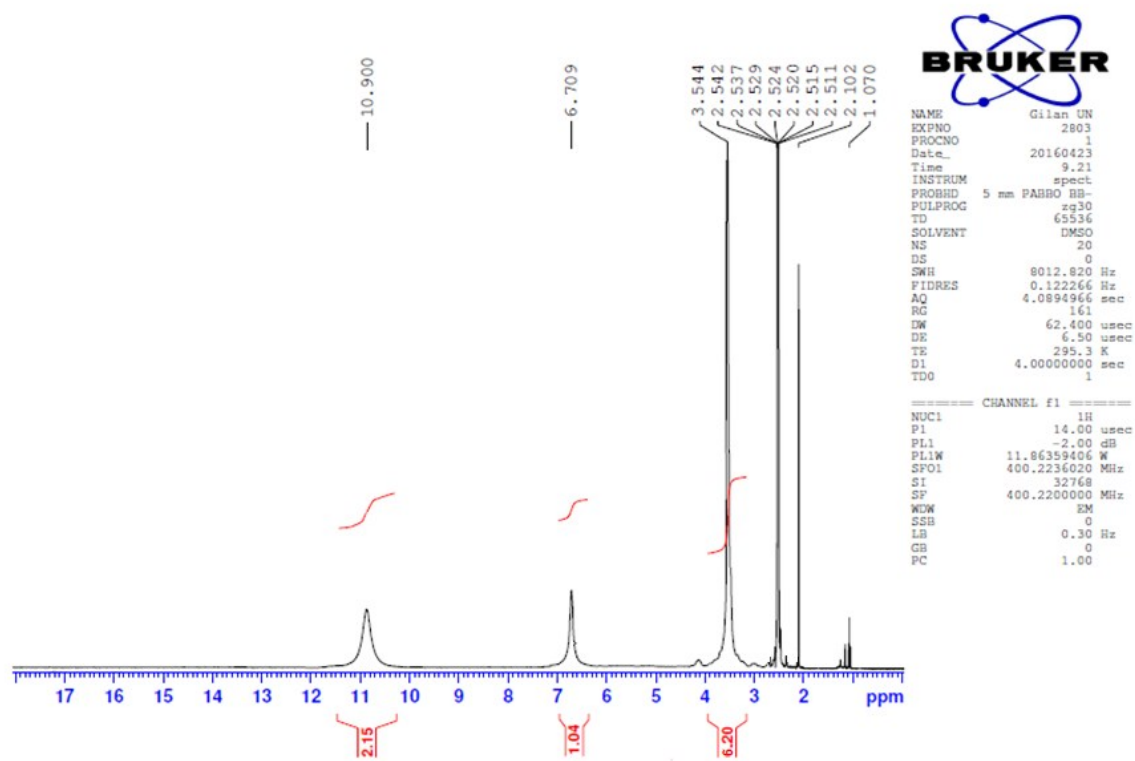

II. A copy of FT-IR, Mass, and NMR spectra of  $[\text{H}_2\text{-DABCO}][\text{ClO}_4]_2$ 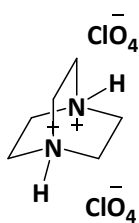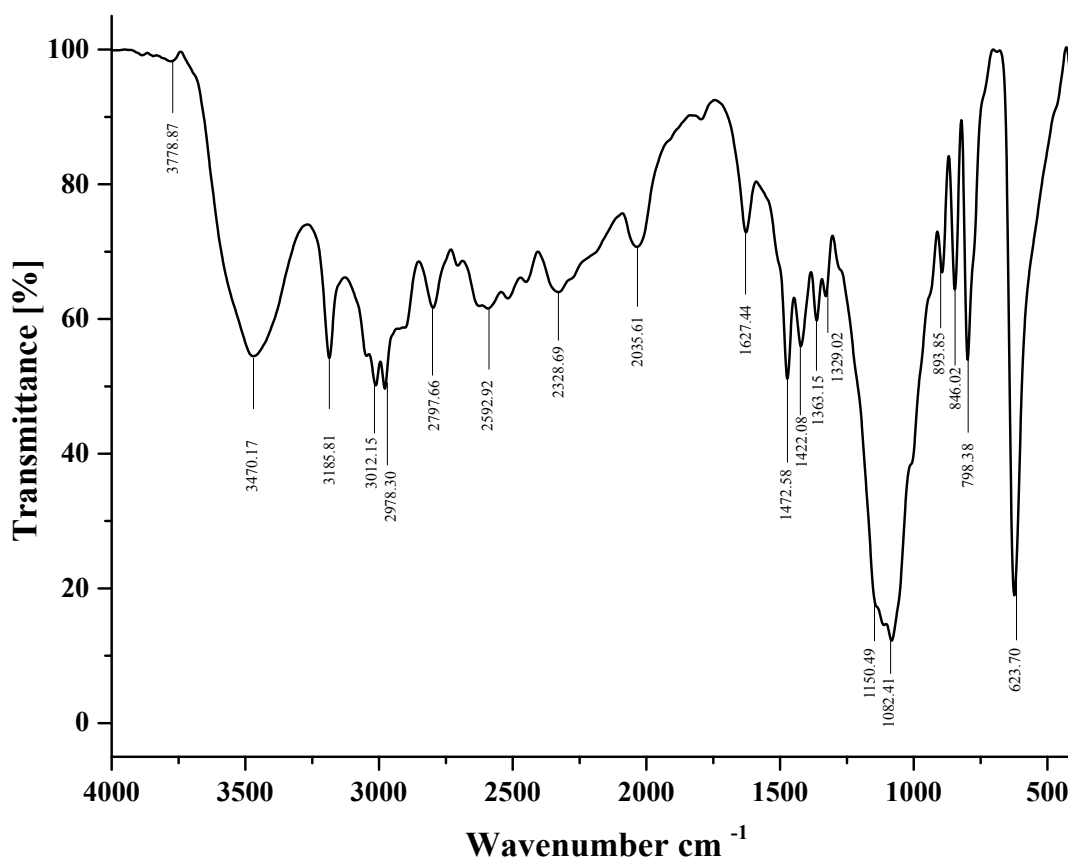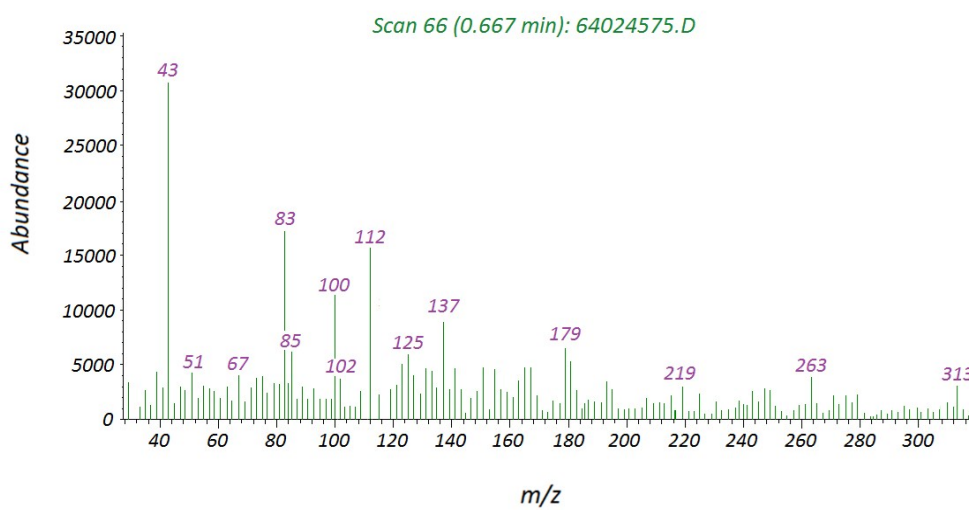

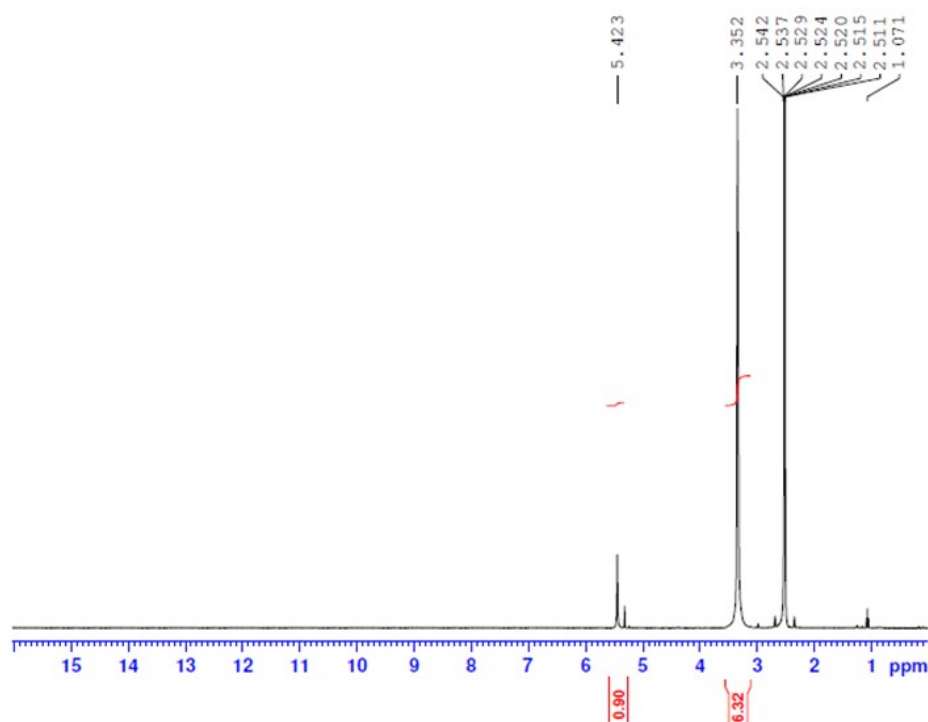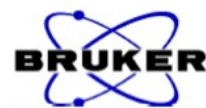

```

NAME      Gilan UN
EXPNO     2801
PROCNO    1
Date_     20160225
Time      17.05
INSTRUM   spect
PROBHD    5 mm PABBO BB-
PULPROG   zg30
TD         65536
SOLVENT   DMSO
NS         20
DS         0
SWH       8012.820 Hz
FIDRES    0.122266 Hz
AQ         4.0894966 sec
RG         161
DW         62.400 usec
DE         6.50 usec
TE         296.1 K
D1         4.0000000 sec
TDO        1

```

```

===== CHANNEL f1 =====
NUC1      1H
P1        14.00 usec
PL1       -2.00 dB
PL1W      11.86359406 W
SFO1      400.2236020 MHz
SI        32768
SF        400.2200000 MHz
WDW       EM
SSB       0
LB        0.30 Hz
GB        0
PC        1.00

```

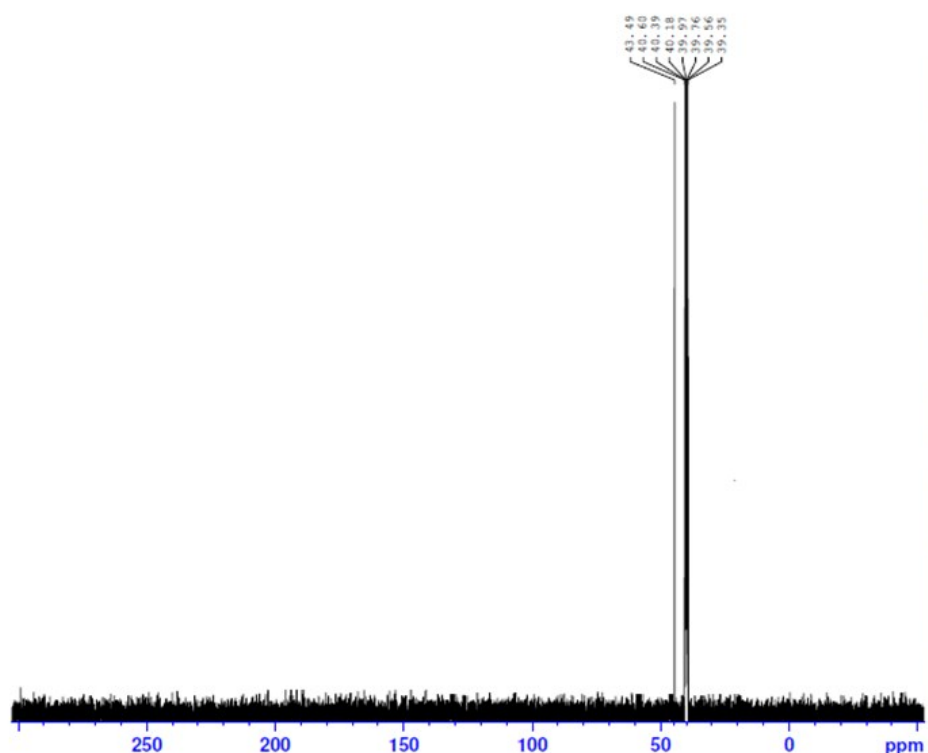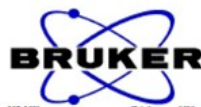

```

NAME      Gilan UN
EXPNO     2800
PROCNO    1
Date_     20160316
Time      15.48
INSTRUM   spect
PROBHD    5 mm PABBO BB-
PULPROG   zgpg30
TD         65536
SOLVENT   DMSO
NS         300
DS         0
SWH       35714.285 Hz
FIDRES    0.544957 Hz
AQ         0.9175540 sec
RG         2050
DW         14.000 usec
DE         6.50 usec
TE         294.5 K
D1         1.0000000 sec
D11        0.0300000 sec
TDO        1

```

```

===== CHANNEL f1 =====
NUC1      13C
P1         9.00 usec
PL1       -0.90 dB
PL1W      42.02801895 W
SFO1      100.6479784 MHz

```

```

===== CHANNEL f2 =====
CPDPRG2   waltz16
NUC2      1H
PCPD2     90.00 usec
PL2       -2.00 dB
PL12      14.16 dB
PL13      17.90 dB
PL2W      11.86359406 W
PL12W     0.28722104 W
PL13W     0.12139934 W
SFO2      400.2216009 MHz
SI        32768
SF        100.6353990 MHz
WDW       EM
SSB       0
LB        1.00 Hz
GB        0
PC        1.40

```

**III. A copy of FT-IR and NMR spectra of 5-amino-7-(naphthalen-2-yl)-7,8-dihydro-[1,2,4]triazolo[4,3-*a*]pyrimidine-6-carbonitrile (4i)**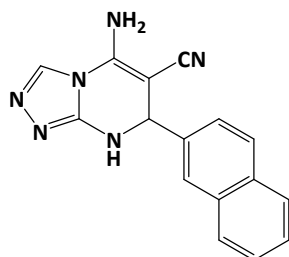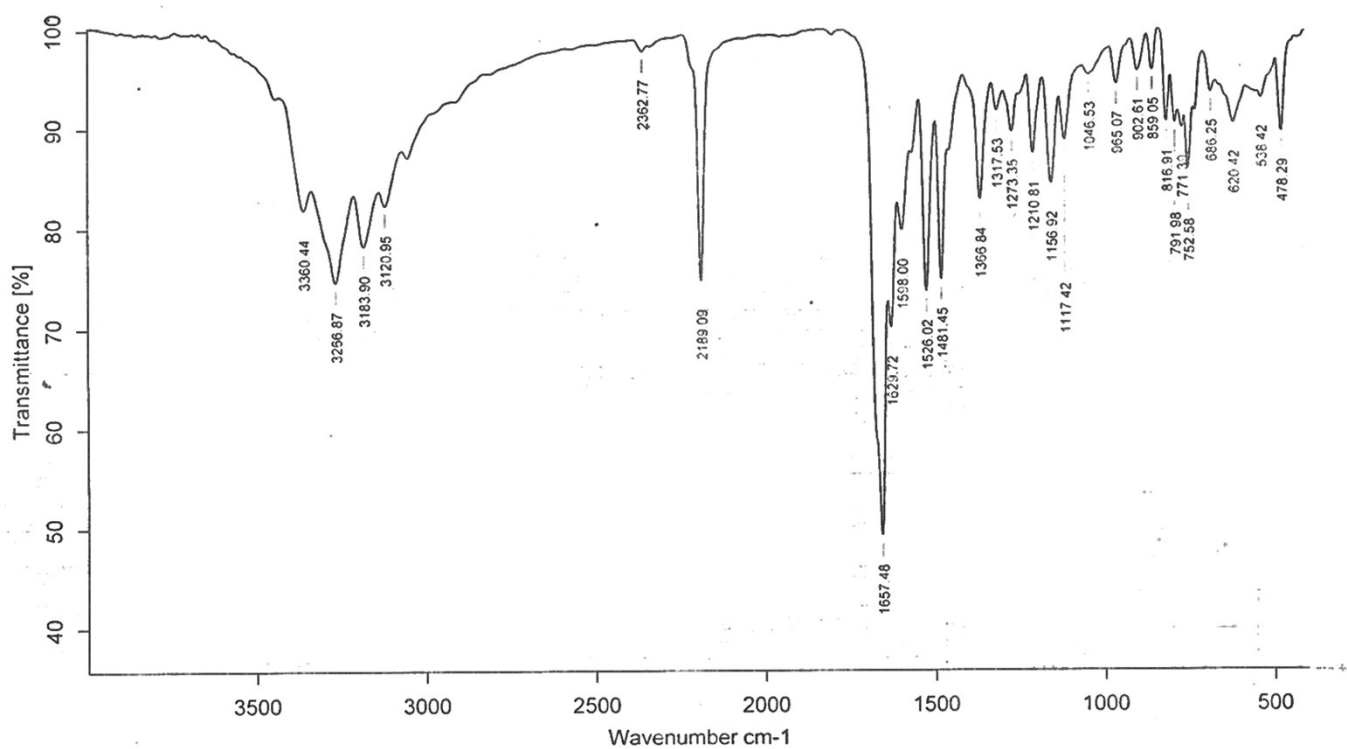

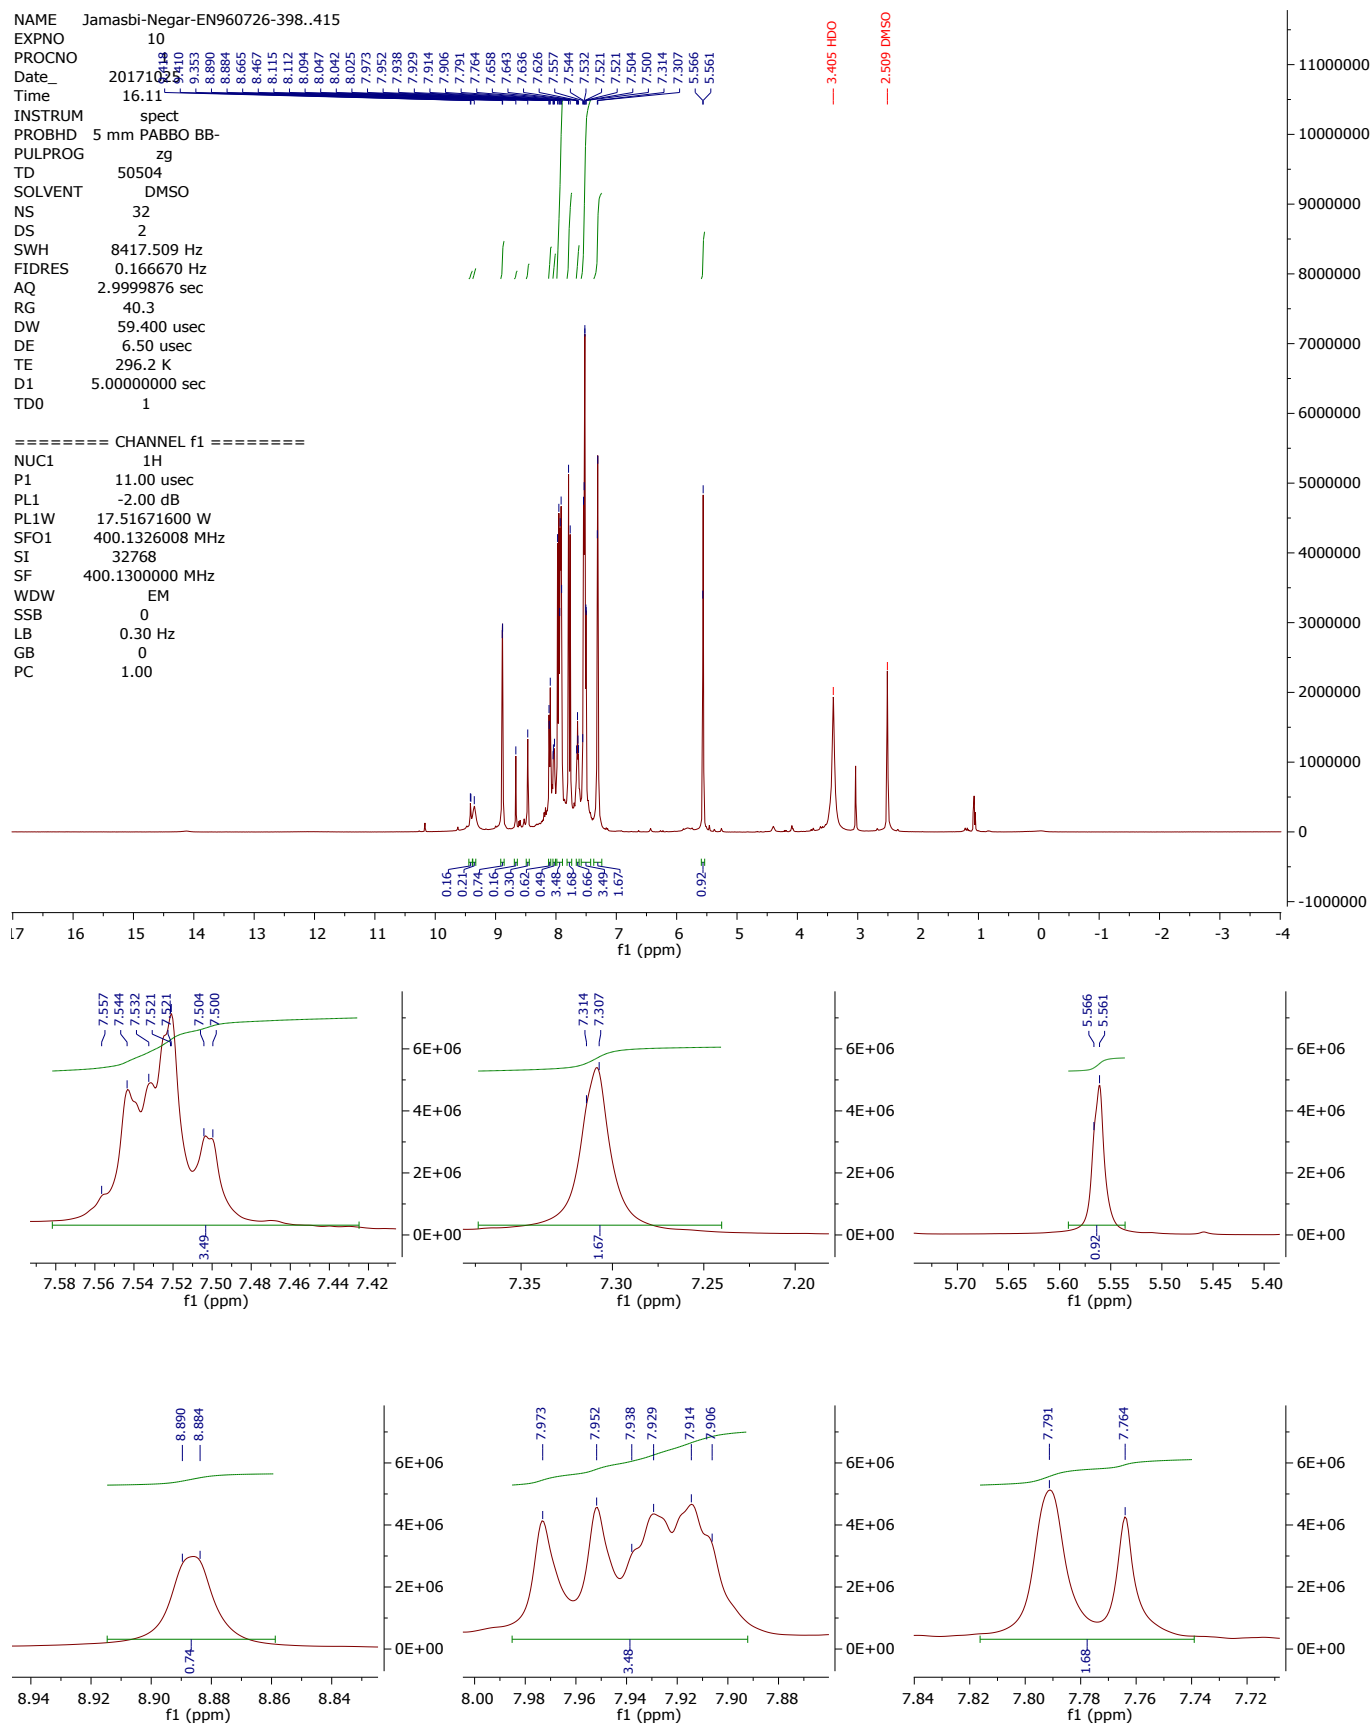

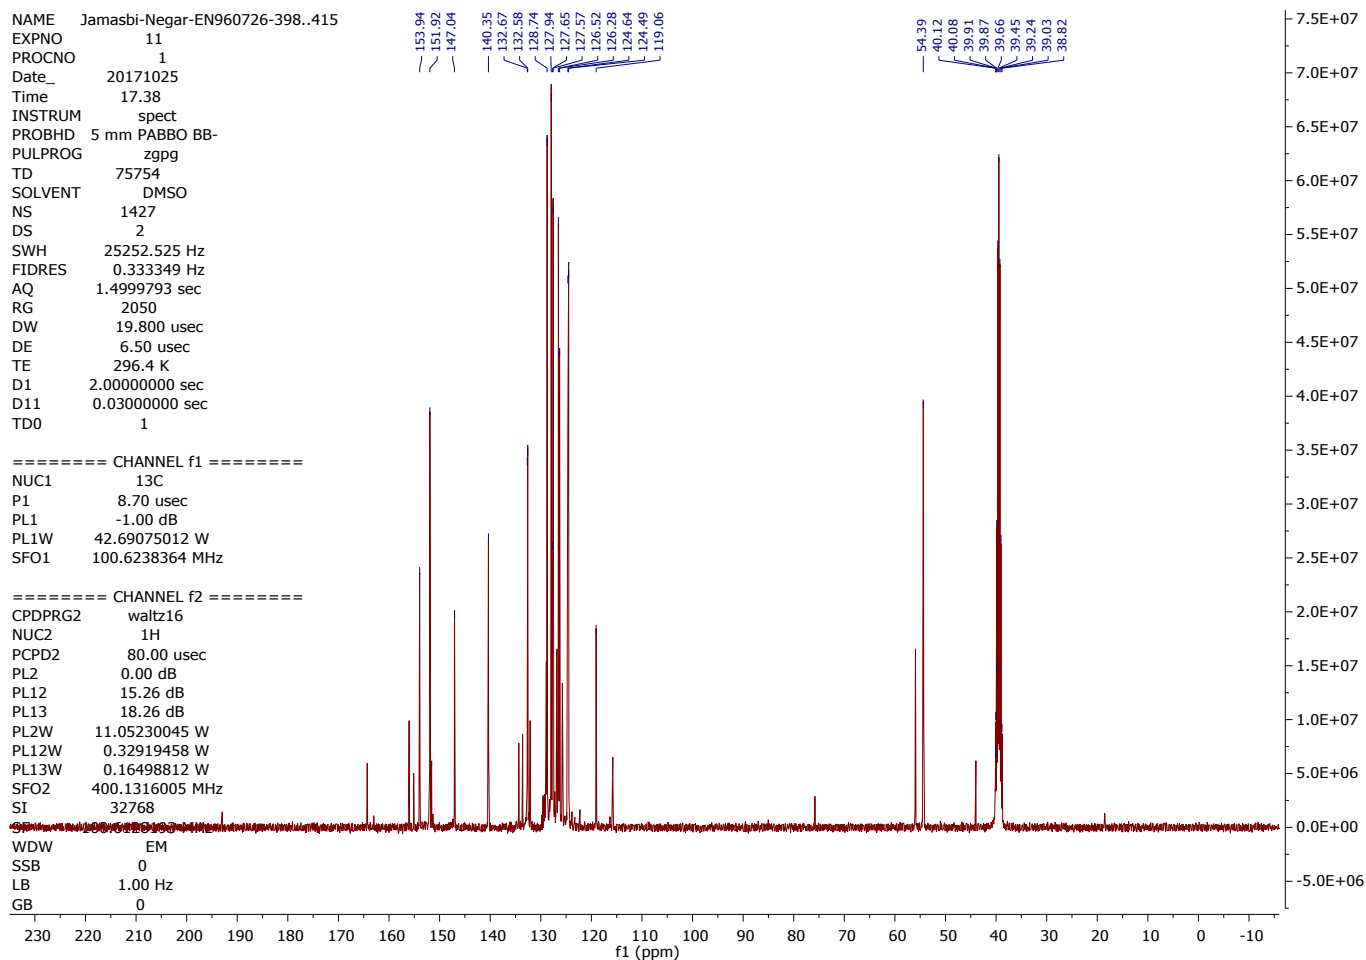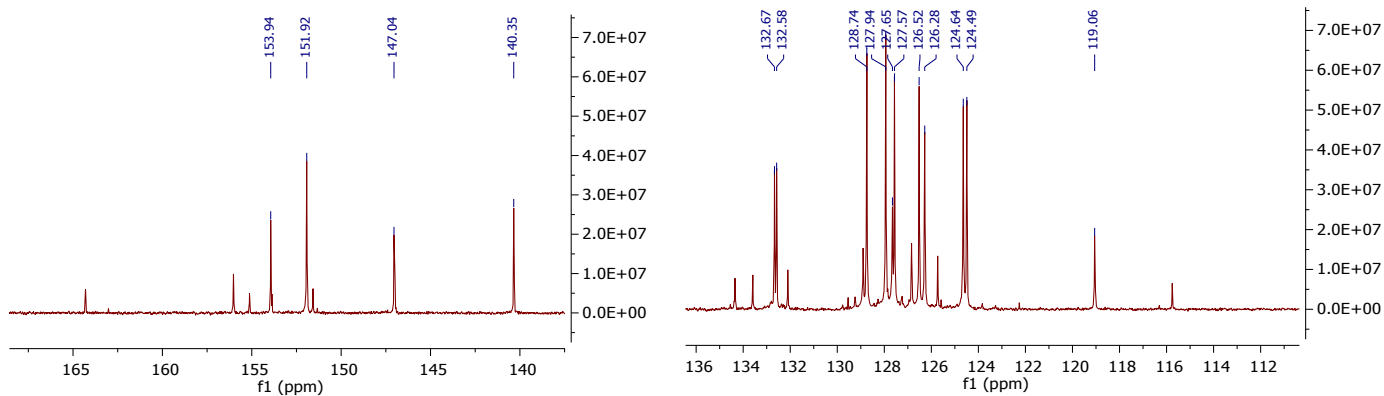



**IV. A copy of FT-IR and NMR spectra of 5-amino-7-(3-methoxyphenyl)-7,8-dihydro-[1,2,4]triazolo[4,3-*a*]pyrimidine-6-carbonitrile (4j)**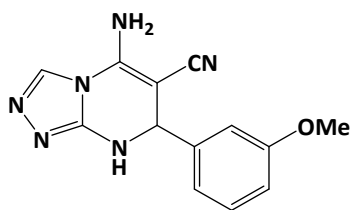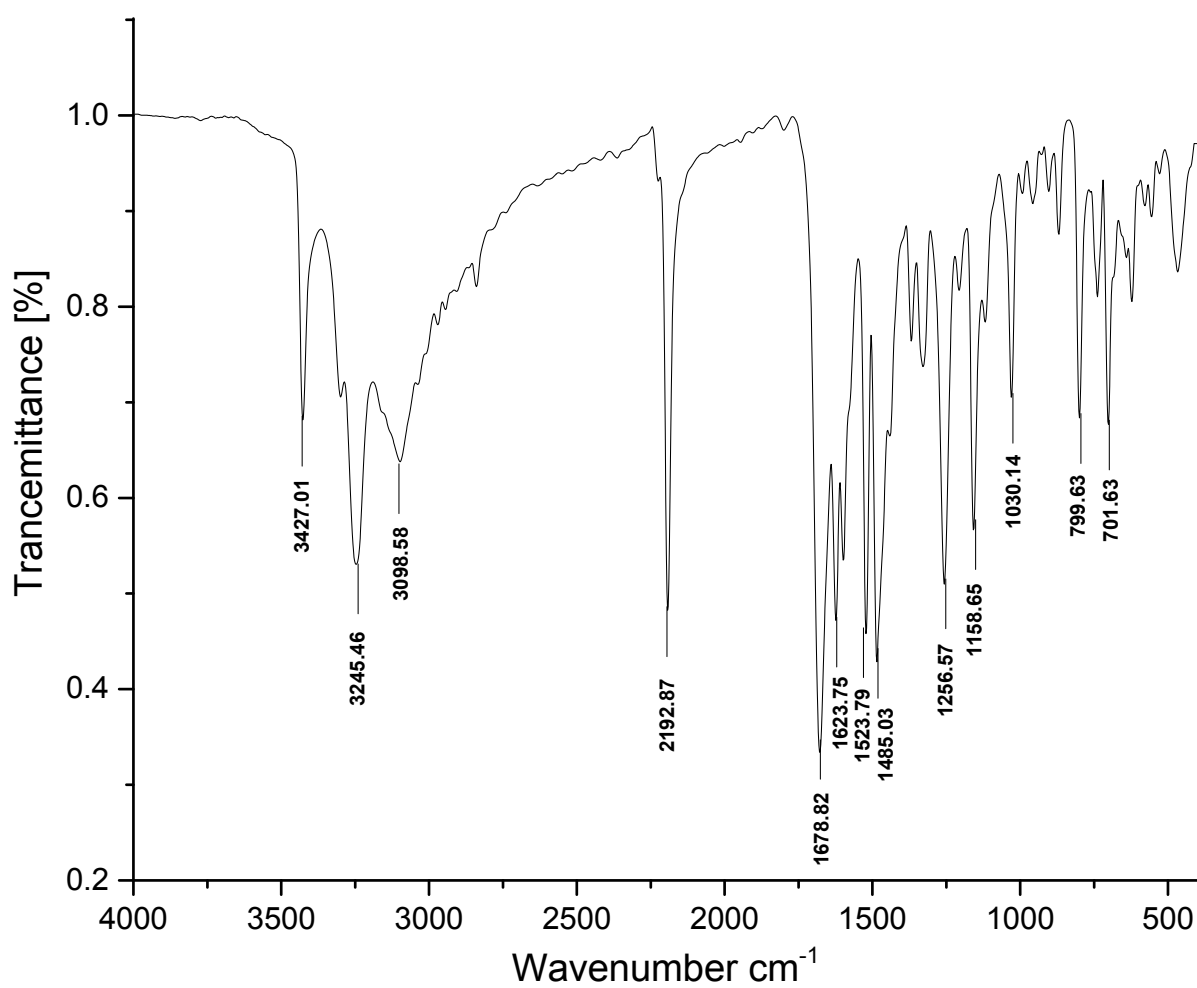

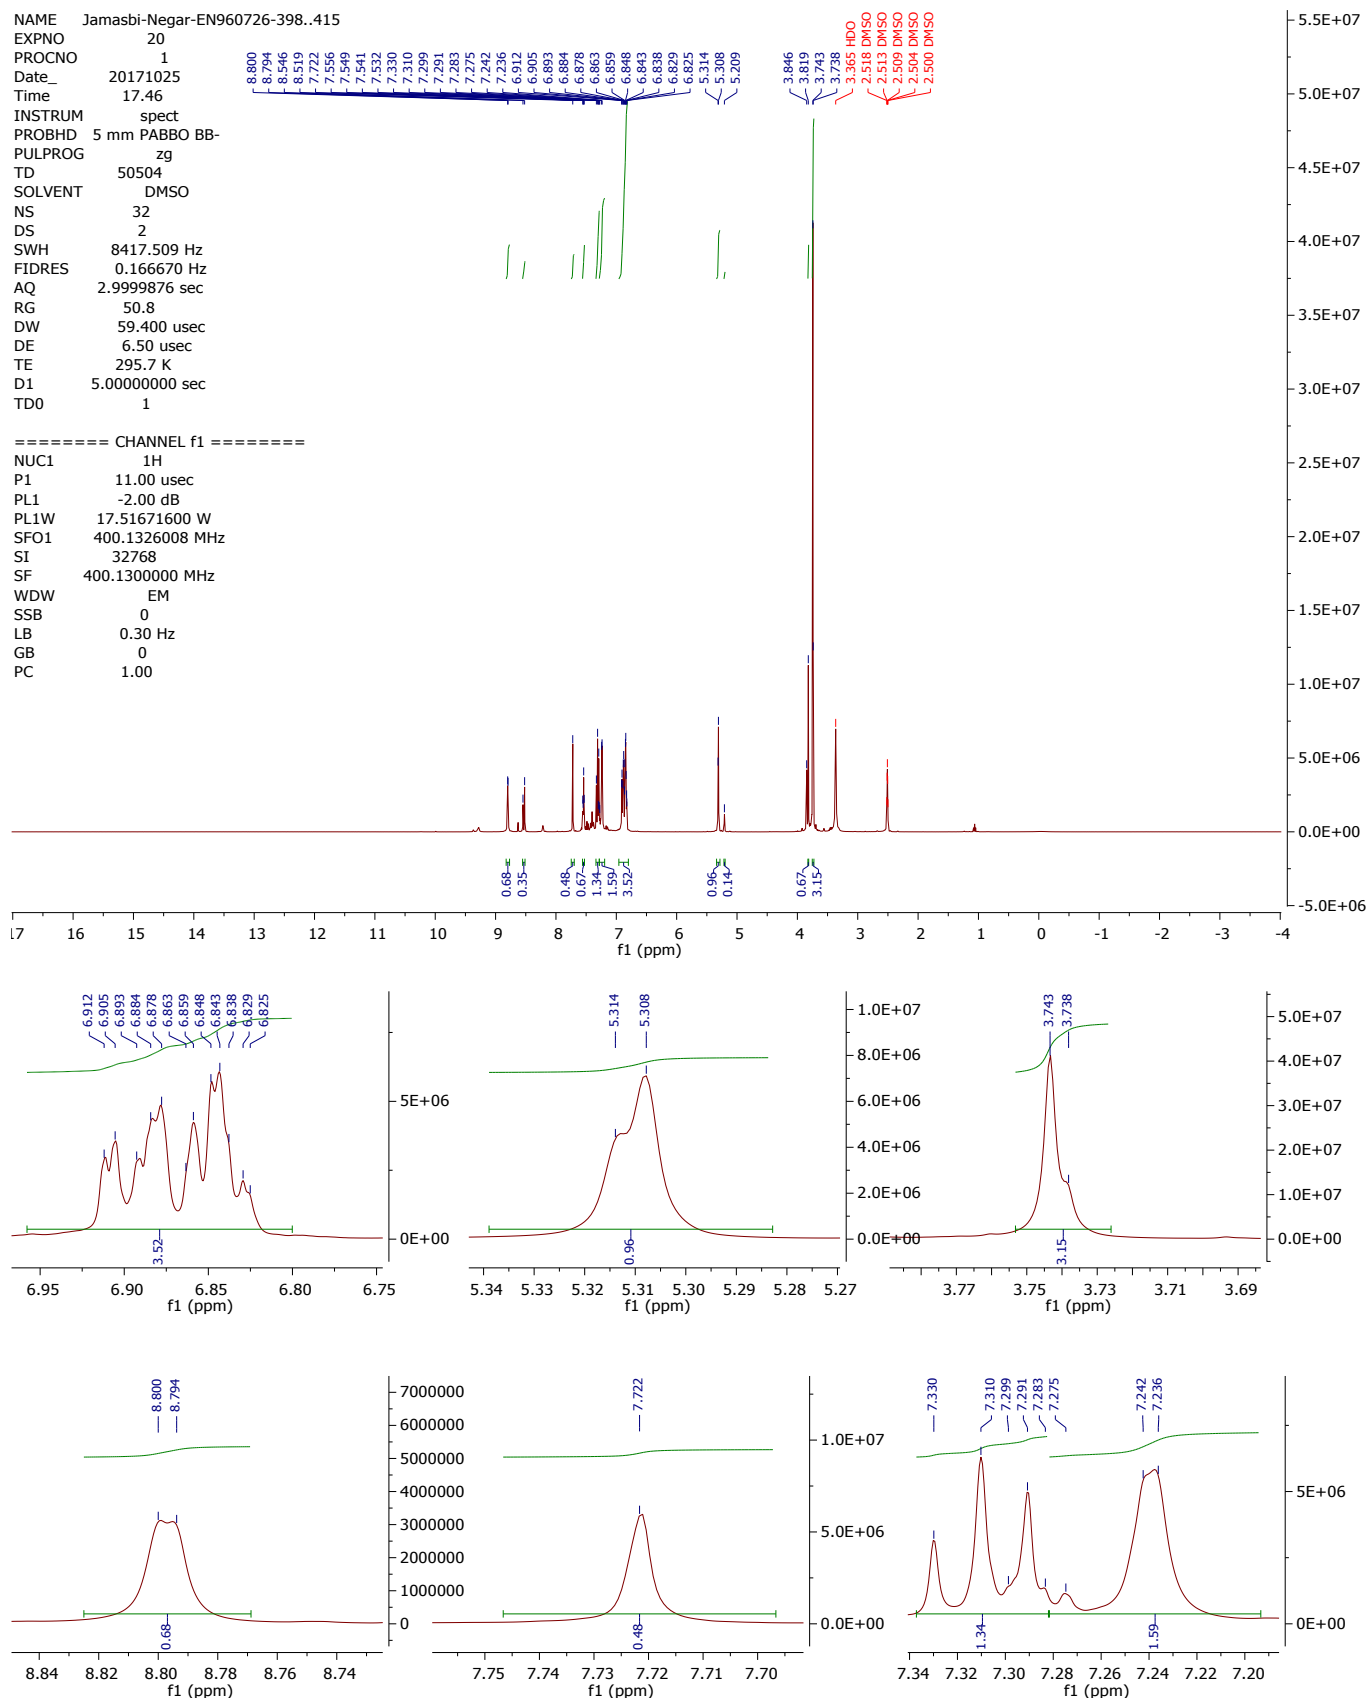

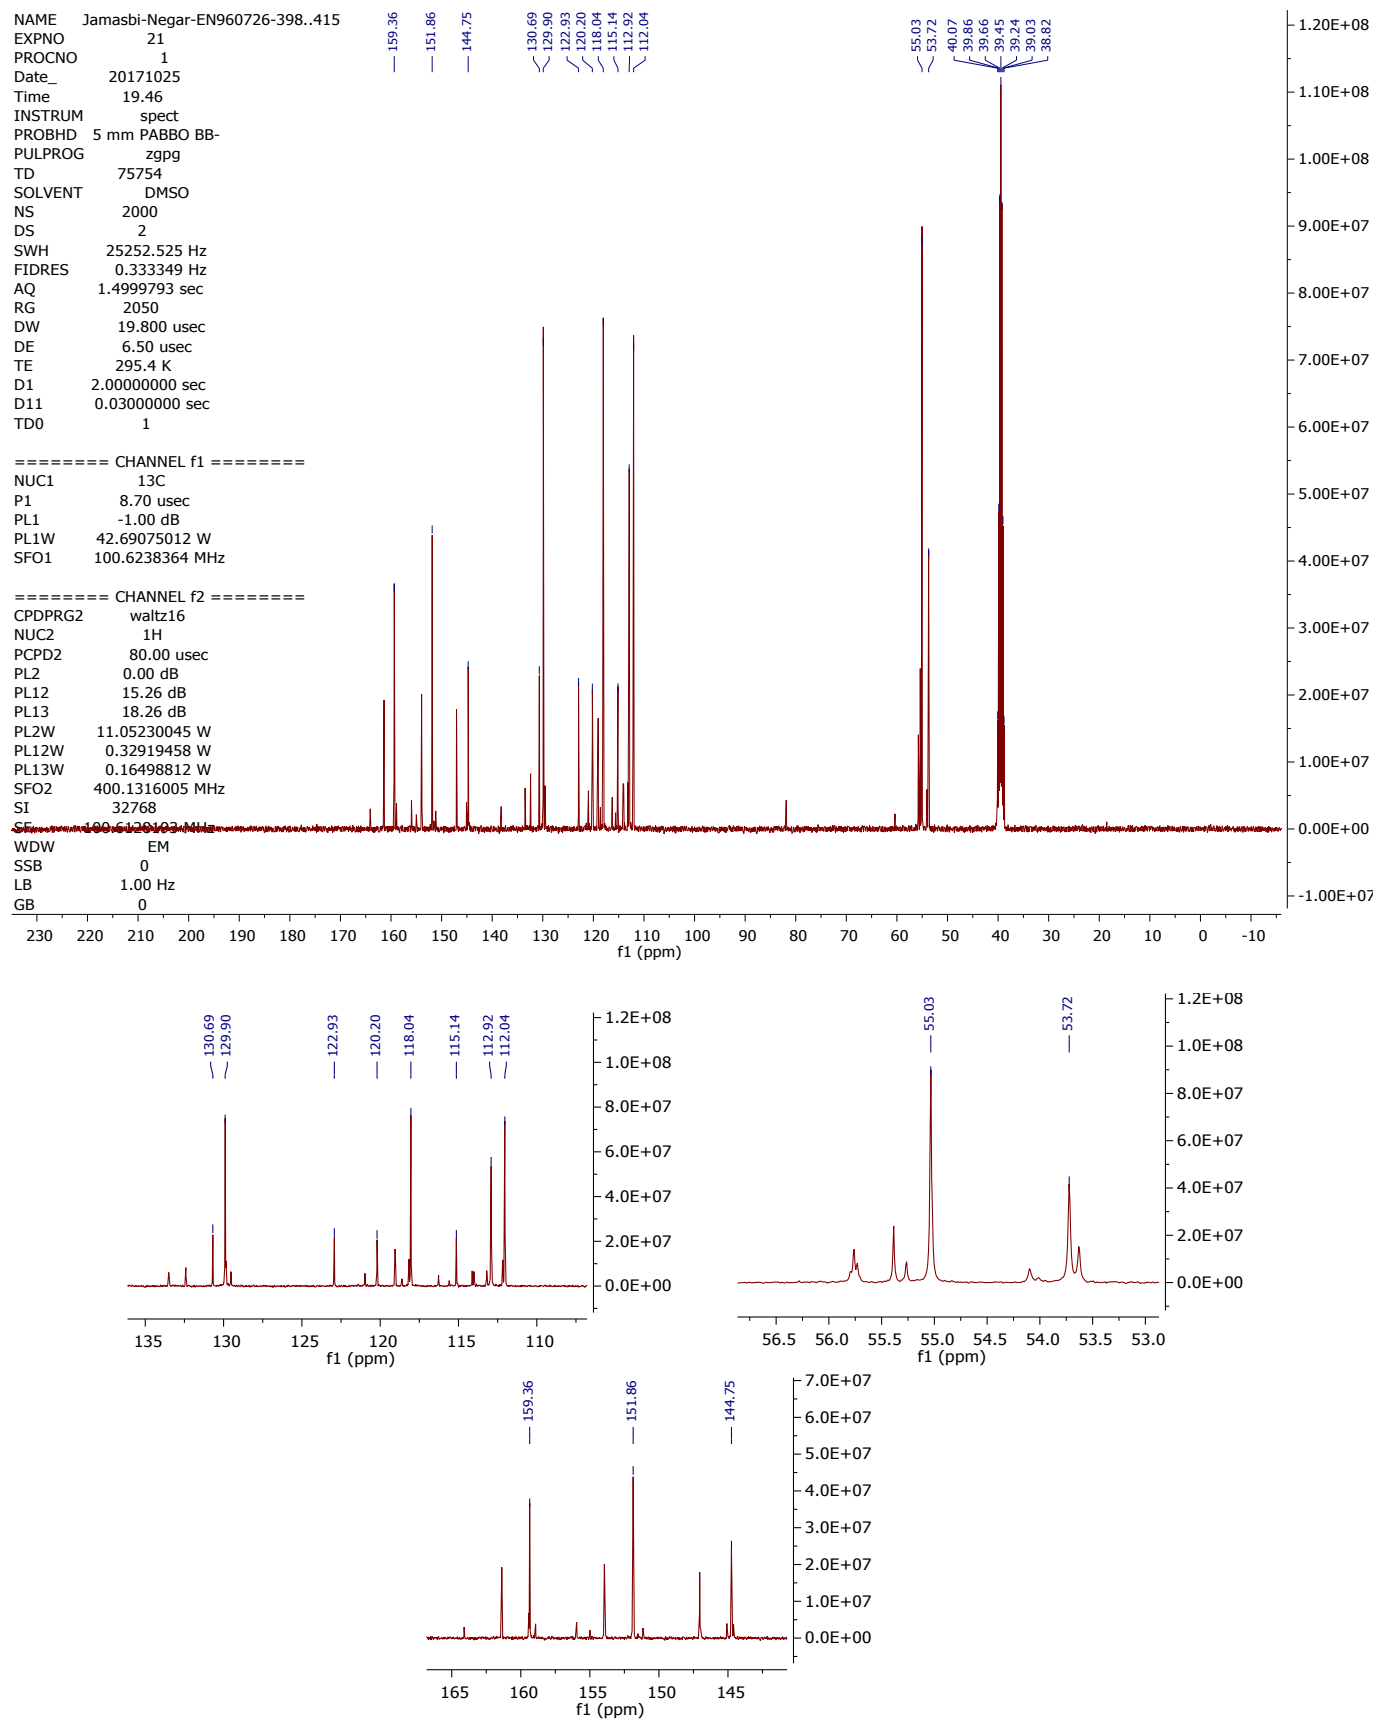

V. A copy of FT-IR and NMR spectra of 5,5'-(1,3-phenylene)bis(7-amino-1,3-dimethyl-2,4-dioxo-1,2,3,4-tetrahydropyrido[2,3-d]pyrimidine-6-carbonitrile) (6o)

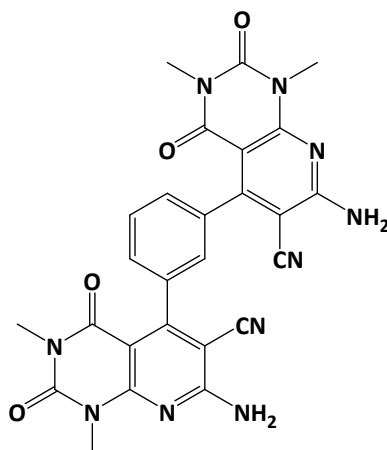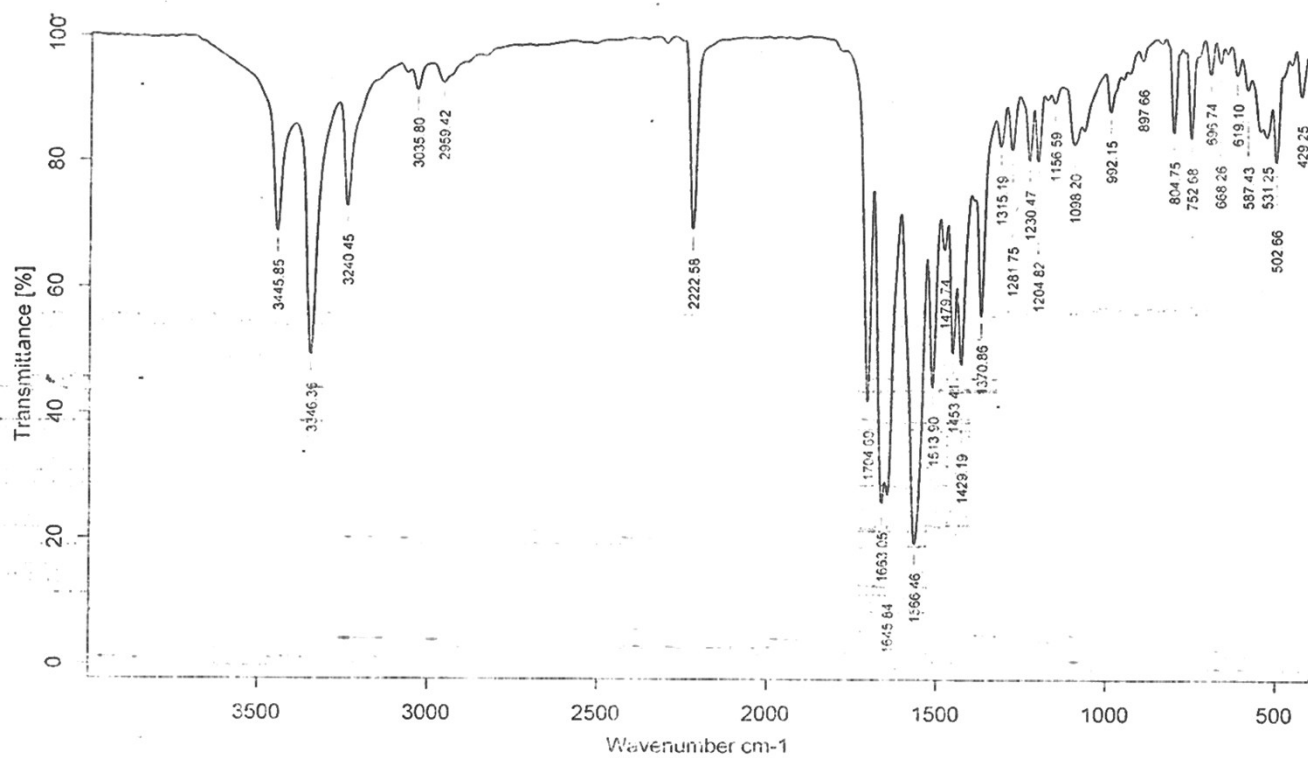

NAME Jamasbi-Negar-EN960726-398..415  
 EXPNO 60  
 PROCNO 1  
 Date\_ 20171026  
 Time 2.26  
 INSTRUM spect  
 PROBHD 5 mm PABBO BB-  
 PULPROG zg  
 TD 50504  
 SOLVENT DMSO  
 NS 32  
 DS 2  
 SWH 8417.509 Hz  
 FIDRES 0.166670 Hz  
 AQ 2.9999876 sec  
 RG 64  
 DW 59.400 usec  
 DE 6.50 usec  
 TE 293.6 K  
 D1 5.00000000 sec  
 TD0 1

===== CHANNEL f1 =====  
 NUC1 1H  
 P1 11.00 usec  
 PL1 -2.00 dB  
 PL1W 17.51671600 W  
 SFO1 400.1326008 MHz  
 SI 32768  
 SF 400.1300000 MHz  
 WDW EM  
 SSB 0  
 LB 0.30 Hz  
 GB 0  
 PC 1.00

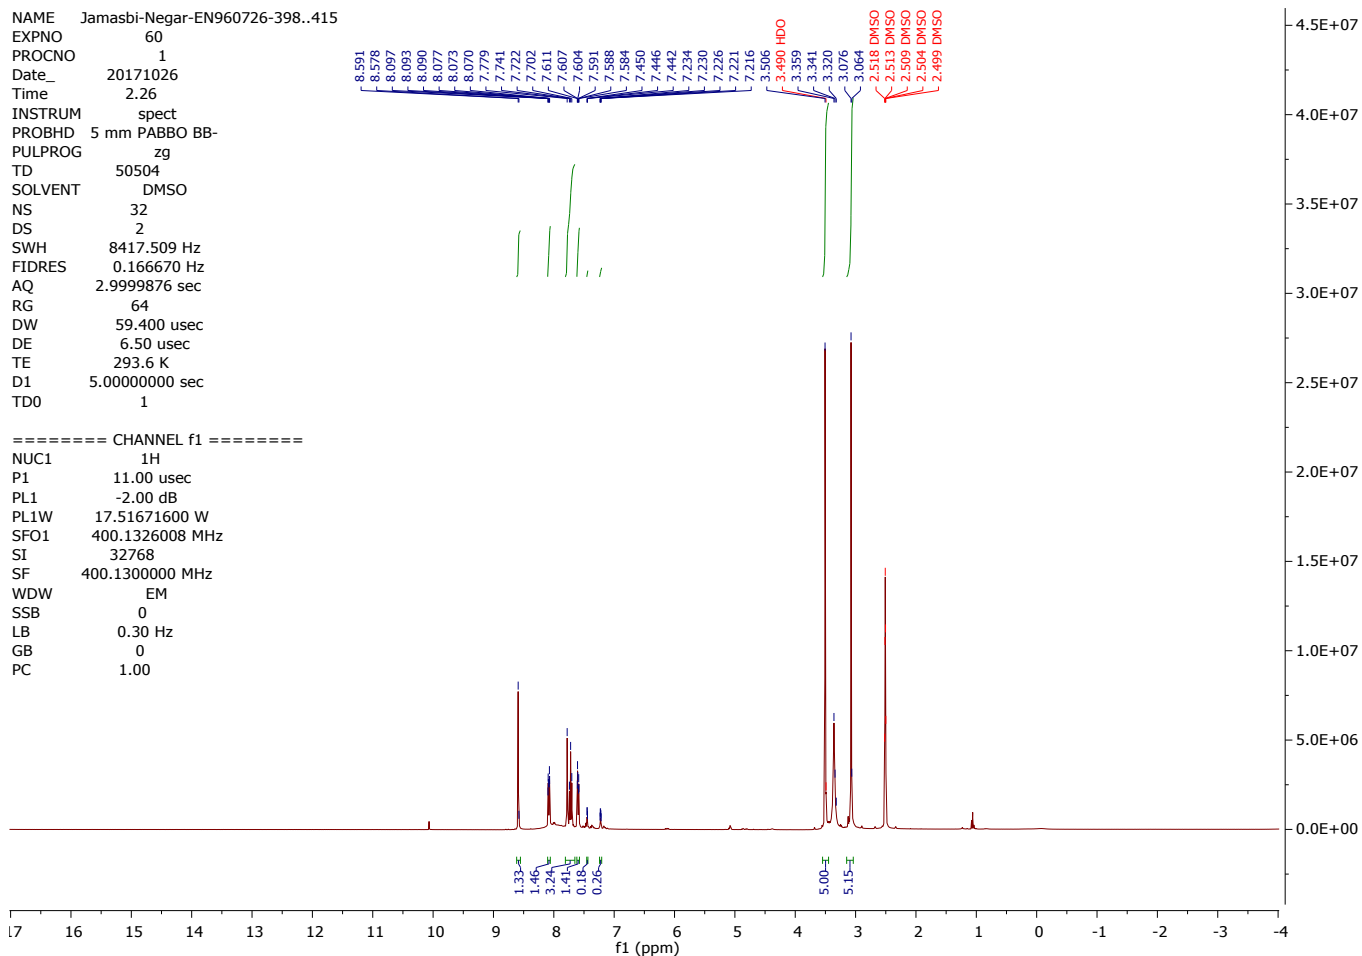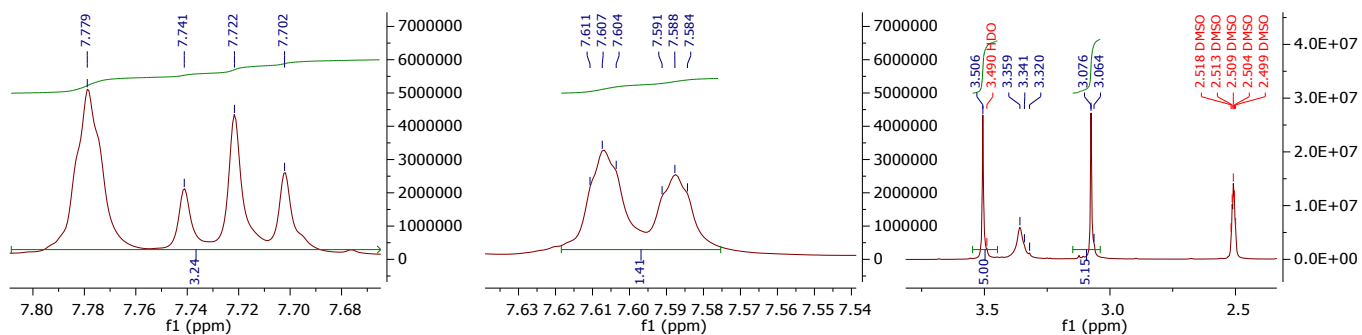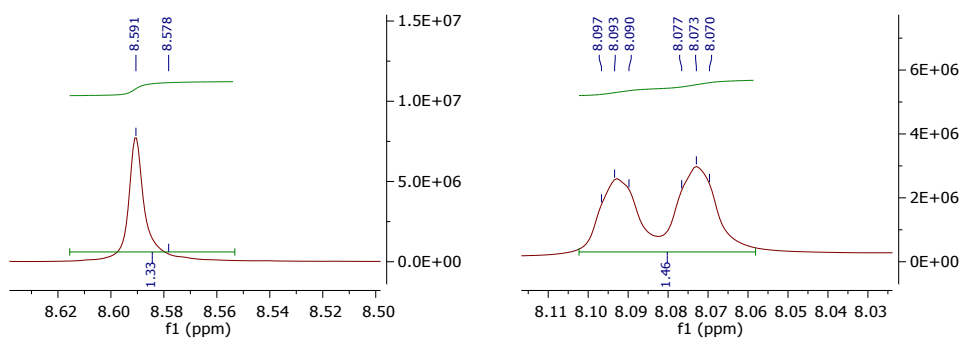

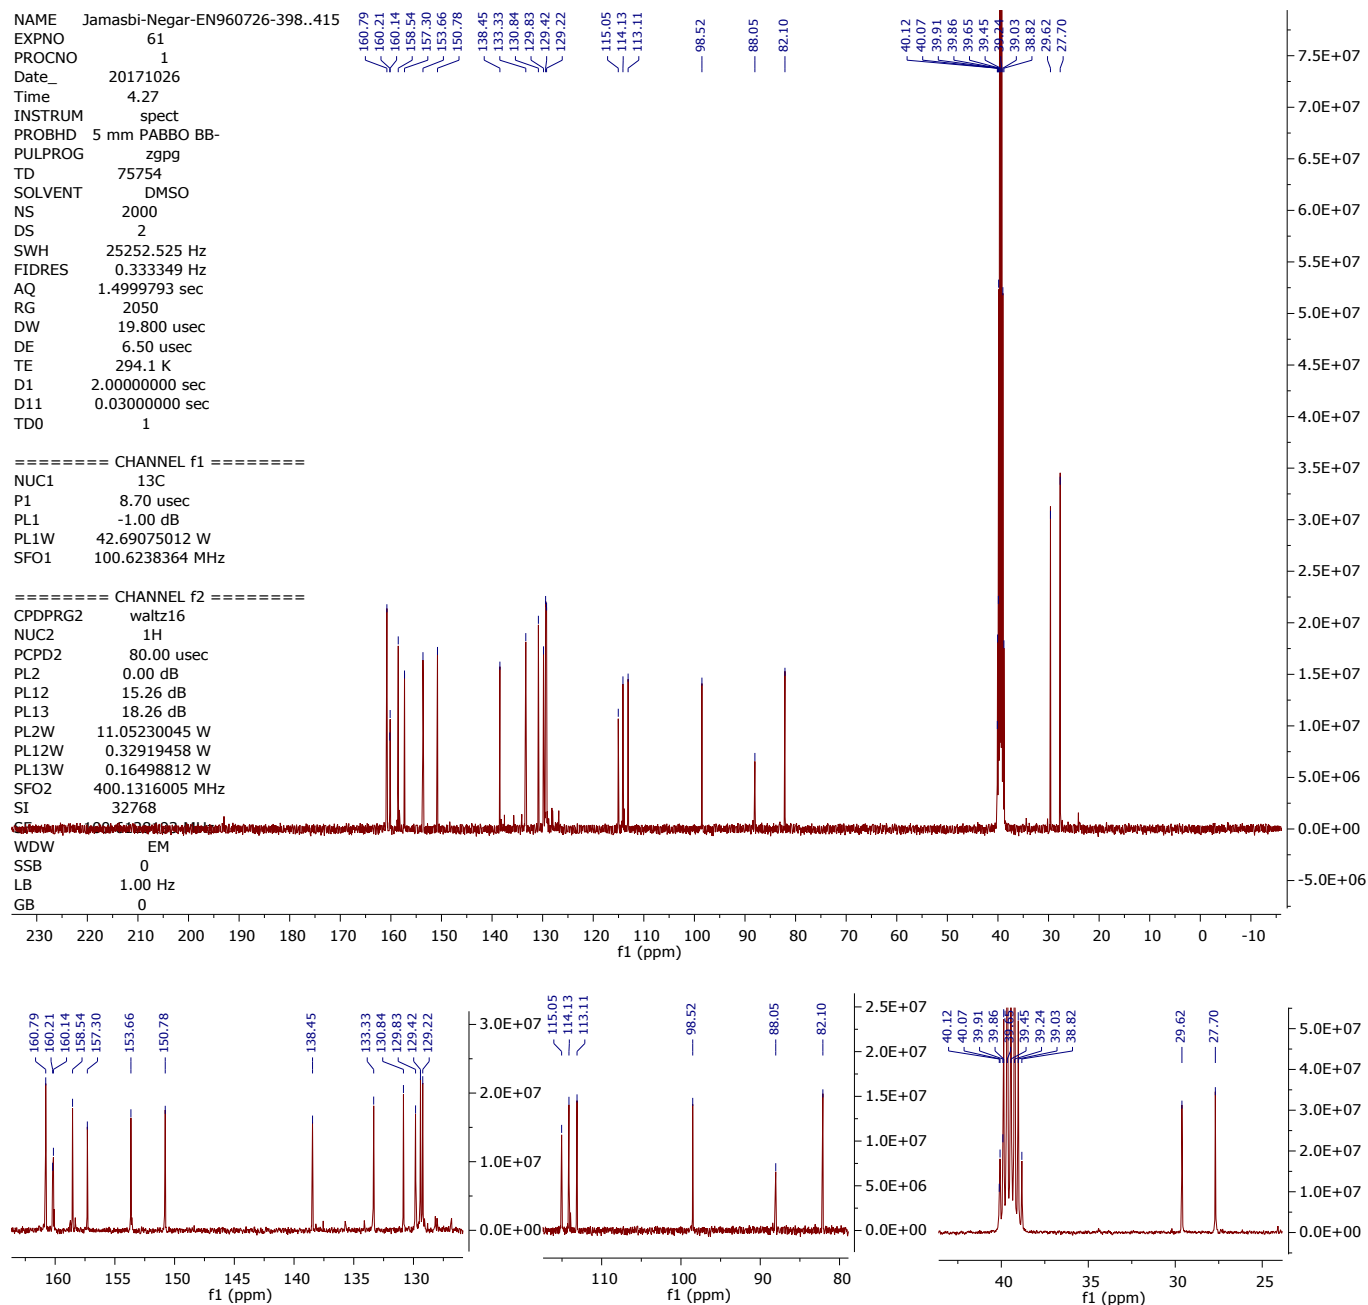

**VI. A copy of FT-IR and NMR spectra of 7-amino-5-(4-(dimethylamino)phenyl)-1,3-dimethyl-2,4-dioxo-1,2,3,4-tetrahydropyrido[2,3-d]pyrimidine-6-carbonitrile (6p)**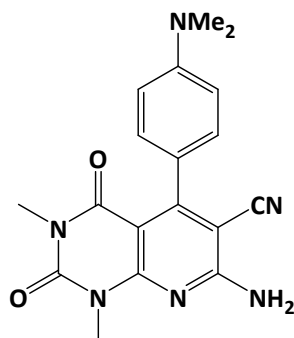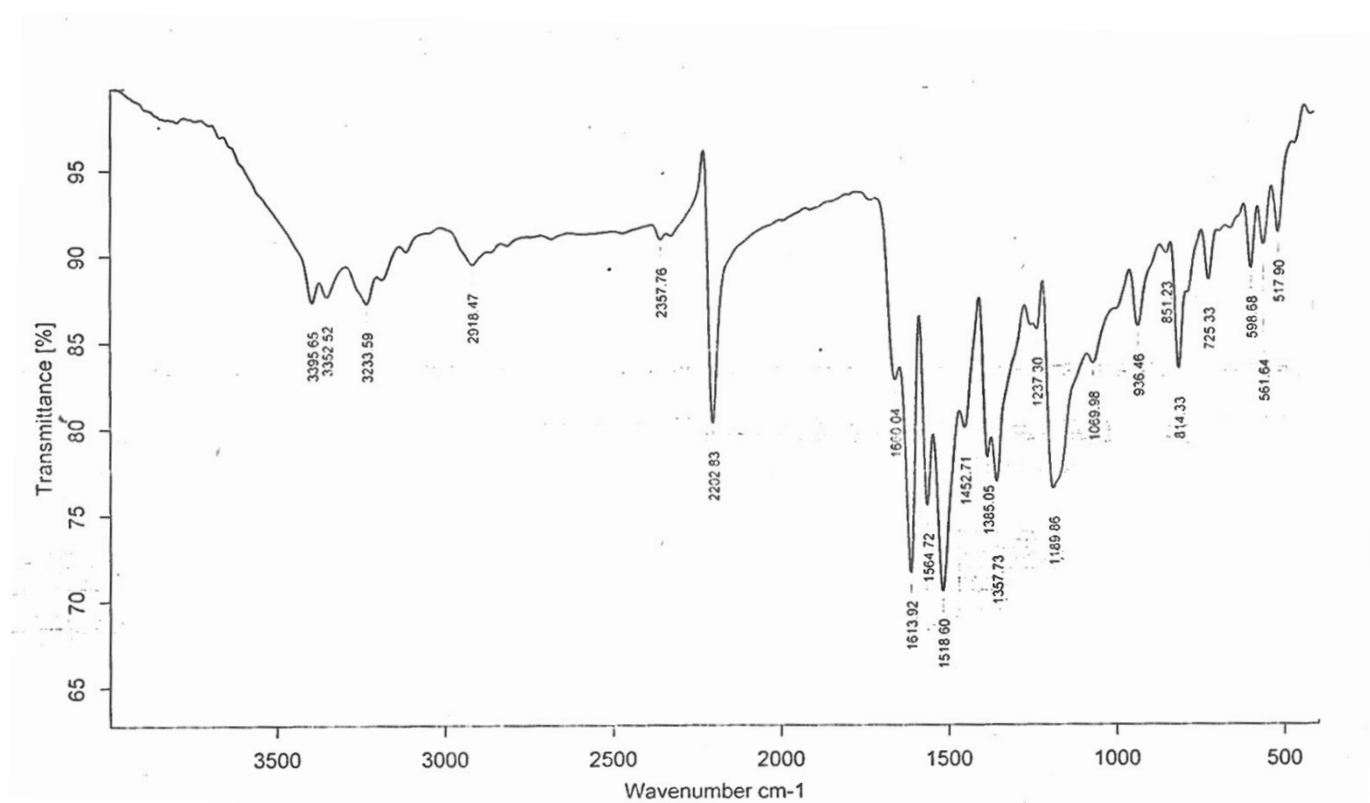

NAME Jamasbi-Negar-EN960726-398..415  
 EXPNO 30  
 PROCNO 1  
 Date\_ 20171025  
 Time 19.56  
 INSTRUM spect  
 PROBHD 5 mm PABBO BB-  
 PULPROG zg  
 TD 50504  
 SOLVENT DMSO  
 NS 32  
 DS 2  
 SWH 8417.509 Hz  
 FIDRES 0.166670 Hz  
 AQ 2.9999876 sec  
 RG 25.4  
 DW 59.400 usec  
 DE 6.50 usec  
 TE 294.7 K  
 D1 5.00000000 sec  
 TD0 1

===== CHANNEL f1 =====  
 NUC1 1H  
 P1 11.00 usec  
 PL1 -2.00 dB  
 PL1W 17.51671600 W  
 SFO1 400.1326008 MHz  
 SI 32768  
 SF 400.1300000 MHz  
 WDW EM  
 SSB 0  
 LB 0.30 Hz  
 GB 0  
 PC 1.00

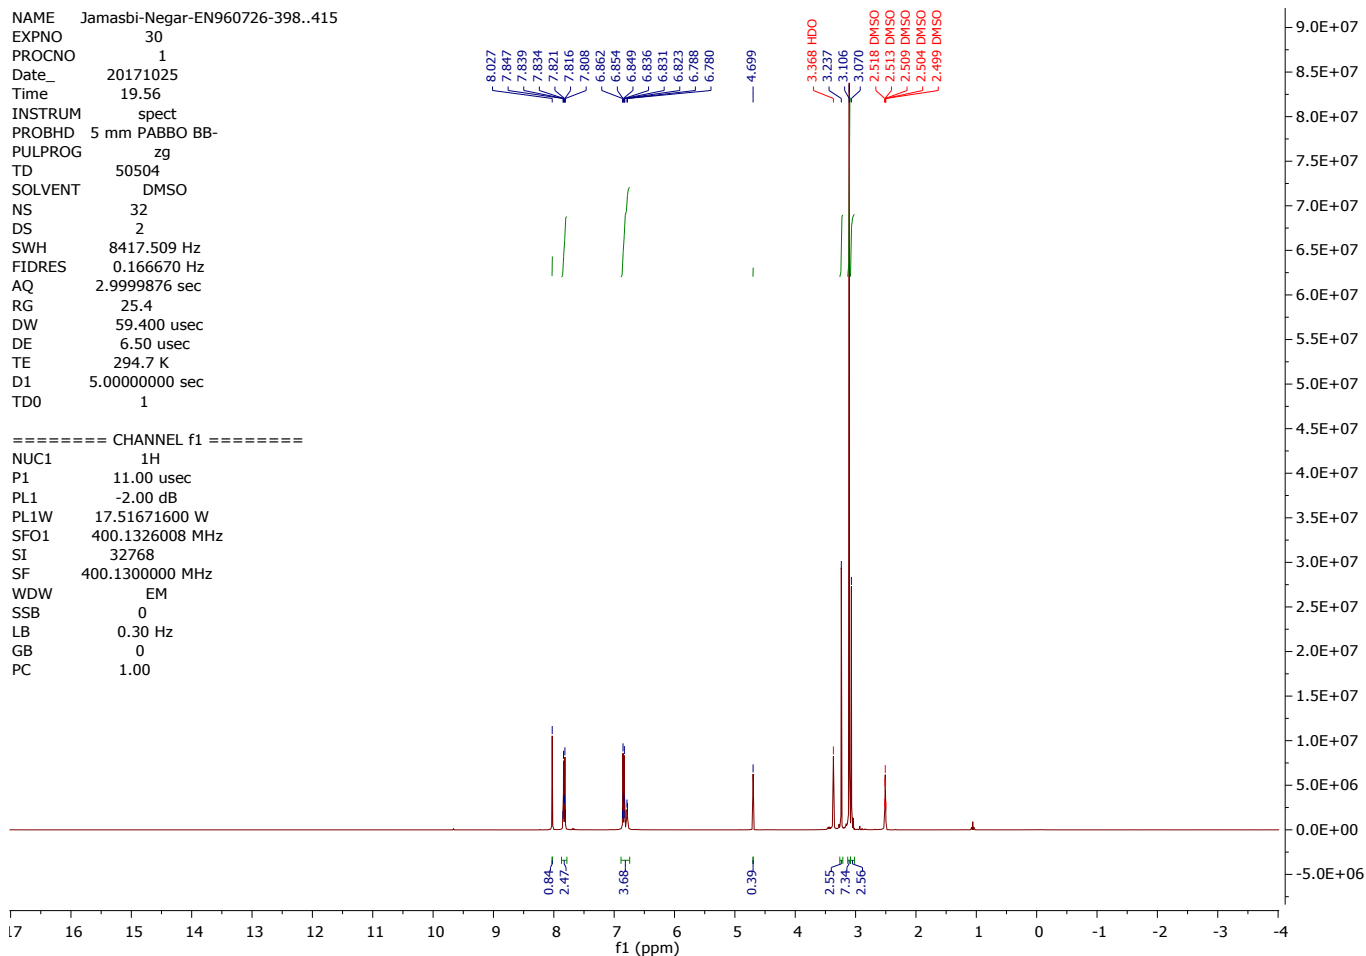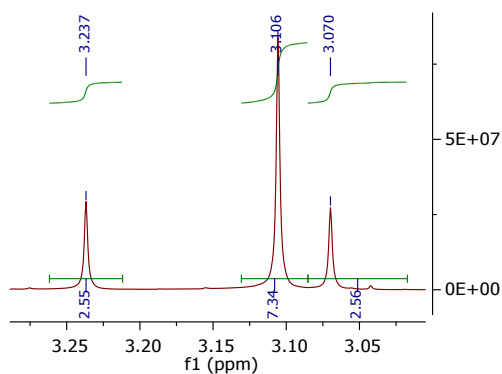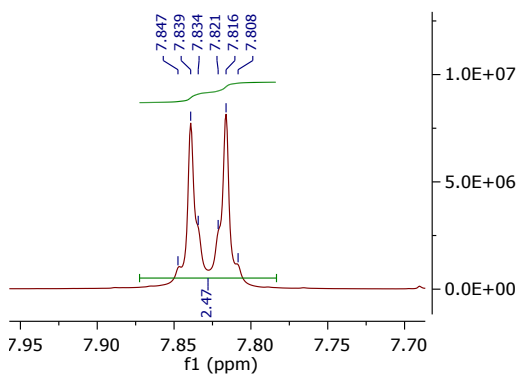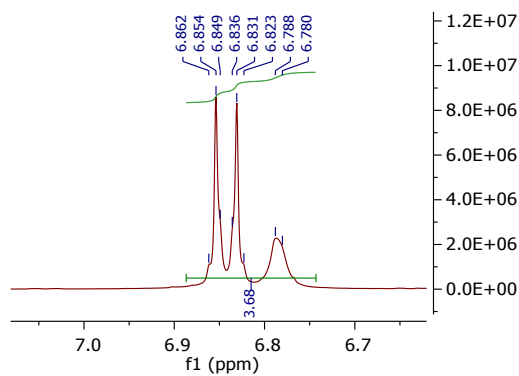



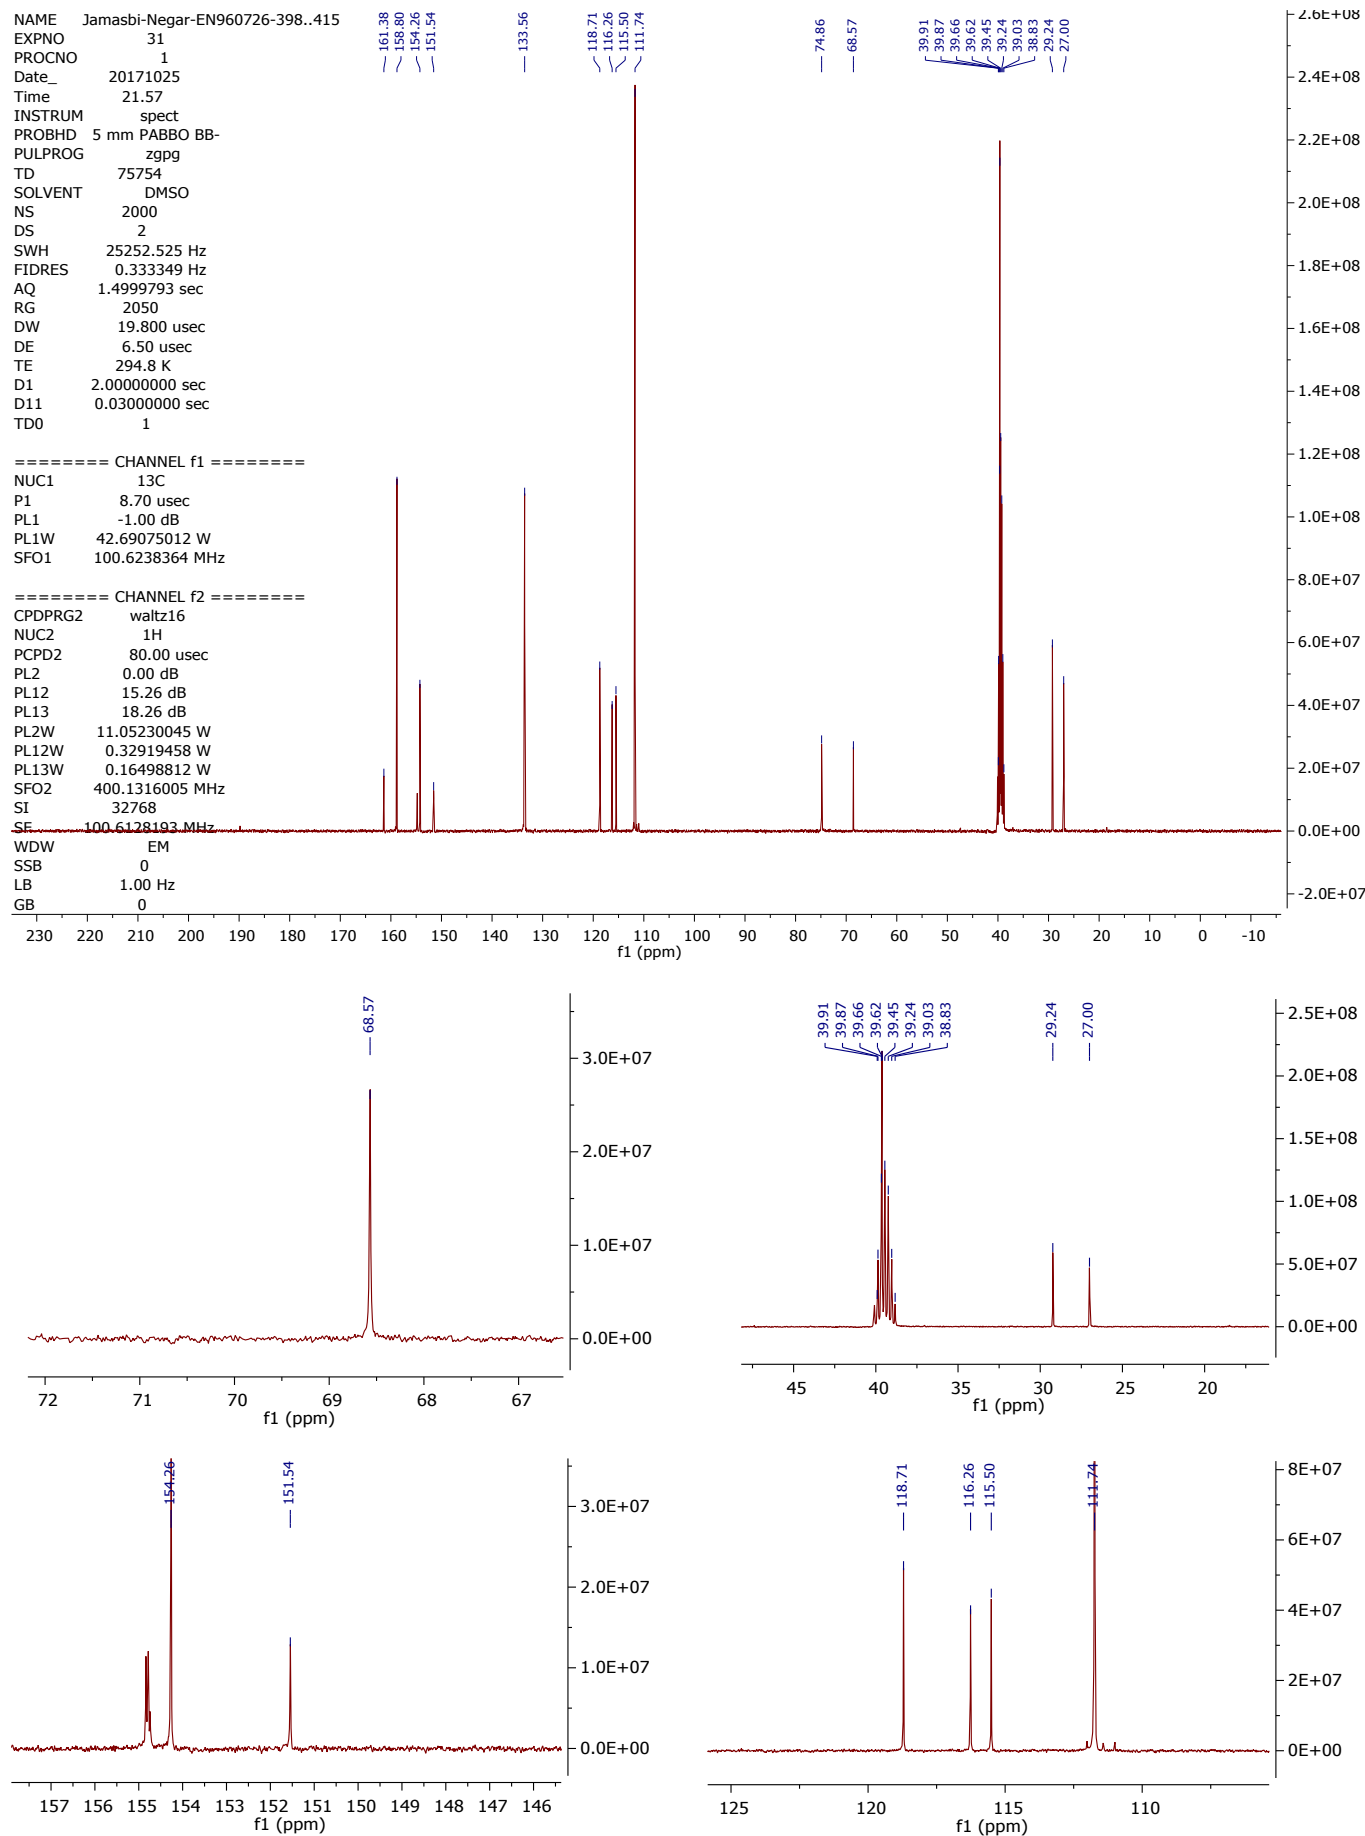

## References

1. F. Shirini, M. S. N. Langarudi, N. Daneshvar, *J. Mol. Liq.*, 2017, **234**, 268.
